# Underestimated regional species diversity in the Cape Floristic Region revealed by phylogenetic analysis of the *Erica abietina*/*E. viscaria* clade (Ericaceae)

M. D. PIRIE<sup>1,2\*</sup>, E. G. H. OLIVER<sup>3</sup>, B. GEHRKE<sup>2</sup>, L. HERINGER<sup>2†</sup>,  
A. MUGRABI DE KUPPLER<sup>4</sup>, N. C. LE MAITRE<sup>1</sup> and D. U. BELLSTEDT<sup>1</sup>

<sup>1</sup>Department of Biochemistry, University of Stellenbosch, Private Bag X1, Matieland 7602, South Africa

<sup>2</sup>Institut für Organismische und Molekulare Evolutionsbiologie, Johannes Gutenberg-Universität, Anselm-Franz-von-Bentzelweg 9a, 55099 Mainz, Germany

<sup>3</sup>Department of Botany and Zoology, University of Stellenbosch, Private Bag X1, Matieland 7602, South Africa

<sup>4</sup>INRES Pflanzenzüchtung, Rheinische Friedrich-Wilhelms-Universität Bonn, Katzenburgweg 5, 53115 Bonn, Germany

Received 19 May 2016; revised 11 November 2016; accepted for publication 25 March 2017

As one of the largest genera of flowering plants, the richness of species in *Erica* (Ericaceae) is all the more remarkable because > 80% of the > 800 species are endemic to the smallest floral kingdom, the Cape Floristic Region (CFR) of South Africa. In the CFR, pockets of narrowly endemic taxa appear in close juxtaposition with their widespread and variable relatives. The taxonomic challenges of Cape *Erica* are epitomized by the complex Cape ‘*abietina*/*viscaria* clade’, currently comprising at least 25 species. We reassess species boundaries and patterns of regional endemism in this clade using a phylogenetic tree inferred from multiple nuclear ribosomal and plastid DNA sequences. We show that the seven currently recognized subspecies of *E. abietina* represent at least three independent, morphologically distinct lineages with non-overlapping geographical distributions. We resurrect the name *E. grandiflora* to include *E. abietina* subsp. *aurantiaca* and subsp. *perfoliosa* and we provide a new name for *E. abietina* subsp. *petraea* (*E. situshiemalis*). This means that *E. abietina* is now an additional endemic species for the Cape Peninsula, including the natural World Heritage Site, Table Mountain National Park.

ADDITIONAL KEYWORDS: biodiversity hotspot – Cape Floristic Region – Cape Peninsula – endemism – external transcribed spacer – phylogeny – species delimitation – Table Mountain National Park.

## INTRODUCTION

Some of the greatest challenges in modern systematics are presented by species-rich, rapidly evolved clades. The sheer numbers of species in large genera such as *Astragalus* L. (2000–3000 species; Wojciechowski, Sanderson & Hu, 1999), *Carex* L. (c. 2000 species; Global Carex Group, 2015) and *Senecio* L. (c. 1000 species; Pelser *et al.*, 2007) present enormous challenges to monographers (Frodin, 2004) and such groups often include species complexes that cannot be resolved

using traditional techniques. *Erica* L. (Ericaceae) is a case in point. The 860 species estimated by Oliver (2000) placed it 21st in Frodin’s list of large genera (Frodin, 2004). The vast majority of *Erica* spp. are restricted to the botanically diverse Cape Floristic Region (CFR) of South Africa (Linder, 2003), where they diversified rapidly within the last c. 10–15 My (Pirie *et al.*, 2016). Dulfer (1964, 1965) published the last revision of *Erica*, but this was based almost exclusively on a small number of herbarium records and the 605 species that were treated have been followed by the description of a considerable number of new species in South Africa and the inclusion in *Erica* of 83 species from former ‘minor genera’, including *Phillipia* Klotzsch and *Blaeria* L. (Oliver, 2000). A more recent

\*Corresponding author. E-mail: [pirie@uni-mainz.de](mailto:pirie@uni-mainz.de)

†Current address: Rheinische Friedrich-Wilhelms-Universität Bonn, Germany.

overview of the vast diversity of *Erica* spp. has been provided in subsequent editions of an electronic identification aid (Oliver & Forshaw, 2012; Volk *et al.*, 2005), but a modern taxonomic revision of the genus as a whole is still lacking.

In one of a series of papers contributing to the taxonomy and systematics of Cape *Erica* spp. (e.g. Oliver, 1976, 1989, 2000; Oliver & Oliver, 2003), Oliver & Oliver (2002) began the enormous task of systematically revising the genus. They proceeded in numerical order following the system of Guthrie & Bolus (1905) based on the sections of Bentham (1839). As is typical for complex patterns of Cape botanical diversity, the species revised by Oliver & Oliver (2002) included a number of taxonomically challenging complexes that are morphologically variable across their geographical distributions. Within some species, they documented breaks in morphological variation that coincided with geographical discontinuities. One example is *E. plukenetii* L. (in which they recognized five subspecies), which shows striking differences, particularly in floral morphology corresponding to three differing pollination ecotypes found in different regions of the CFR (Van der Niet *et al.*, 2014). Two further examples are *E. abietina* L. (seven subspecies) and *E. viscaria* L. (six subspecies), which also show great variation in floral morphology across their distributions. Both species have long-tubed flowers generally typical of bird pollination (Rebello, Siegfried & Oliver, 1985), but within each there is significant variation in both size and colour (Fig. 1), with the associated potential importance for reproductive isolation and the speciation process (Rebello & Siegfried, 1985).

Molecular phylogenetic tools offer the means to test higher level groupings of species, to identify morphologically cryptic taxa and to delimit species (Doyle, 1997; Fujita *et al.*, 2012). Global analyses of independent molecular data for *Erica* are now available (Pirie, Oliver & Bellstedt, 2011; Pirie *et al.*, 2016) and as anticipated by Oliver & Oliver (2002), the species treated in their work proved to represent a mixture of both closely and more distantly related clades. This reflects parallel evolution of floral morphological characters (Pirie *et al.*, 2011), on which the classification of Guthrie & Bolus (1905) was based.

In the case of *E. plukenetii*, molecular phylogenetic analyses confirmed the monophyly of the species as delimited by Oliver & Oliver (2002), despite its high morphological variability (Pirie *et al.*, 2016; Van der Niet *et al.*, 2014). The status of *E. abietina* and *E. viscaria* has yet to be tested with equivalent data. They belong to an '*abietina/viscaria* clade', identified on the basis of nuclear ribosomal internal transcribed spacer (ITS) (Pirie *et al.*, 2011) and combined ITS and plastid sequence data (Pirie *et al.*, 2016).

This clade currently represents 25 species, including 13 of the 24 classified in section *Pleurocallis* (species 12–35 in Oliver & Oliver, 2002), one of several (non-monophyletic) sections characterized by long tubular flowers.

Four of the seven subspecies of *E. abietina* feature on the IUCN Red List of Endangered Plants (IUCN, 2016; Raimondo *et al.*, 2009) and their taxonomic status (and that of the other taxa in the *abietina/viscaria* clade) has a direct influence on regional assessments of species diversity and endemism and hence for setting optimal conservation priorities. *Erica abietina* subsp. *perfoliosa* E.G.H.Oliv. & I.M.Oliv. is classified as Vulnerable and *E. abietina* subsp. *petraea* E.G.H.Oliv. & I.M.Oliv. has been assessed as Endangered (Raimondo *et al.*, 2009). These and the much more common and widespread *E. abietina* subsp. *aurantiaca* E.G.H.Oliv. & I.M.Oliv. are found on the mainland in the Cape Fold Mountains of South Africa. However, most subspecies of *E. abietina* are restricted to the Cape Peninsula, on the south-western tip of the African continent (Fig. 2), where they fall within the protection of the natural World Heritage Site, Table Mountain National Park. Two of these Cape Peninsula endemic subspecies also feature on the red list: *E. abietina* subsp. *constantiana* E.G.H.Oliv. & I.M.Oliv. as Rare and *E. abietina* subsp. *diabolis* E.G.H.Oliv. & I.M.Oliv. as Critically Endangered (Raimondo *et al.*, 2009).

Table Mountain is close to Cape Town and is threatened by anthropogenic influences including habitat destruction, rampant spread of alien vegetation and extreme suppression of the natural fire regime (Trinder-Smith, Cowling & Linder, 1996; Van Wilgen, Forsyth & Prins, 2012). The last of these has a particularly negative impact on floral elements, such as most *Erica* spp., that depend on post-fire regeneration from seed (Kraaij & Van Wilgen, 2014). Table Mountain and the adjacent, largely transformed, vegetation of the Cape Flats also house an endemic subspecies of *E. viscaria* (*E. viscaria* subsp. *viscaria*), but most of the diversity of *E. viscaria* is found in other regions of the south-western CFR, particularly the Hottentots Holland Mountains and the Kogelberg Biosphere Reserve on the opposite side of False Bay (Fig. 2). In contrast to Table Mountain, in many other areas of the CFR such as these, human intervention has resulted in increased rather than decreased frequency of fires (Kraaij & Van Wilgen, 2014). This phenomenon also impacts post-fire reseedling as it restricts the natural succession of fynbos vegetation to its initial stages prior to replenishment of the seed bank (Rebello *et al.*, 2006). In both cases, an accurate representation of species diversity and distribution is needed in order to inform policy-makers and press for appropriate conservation management.

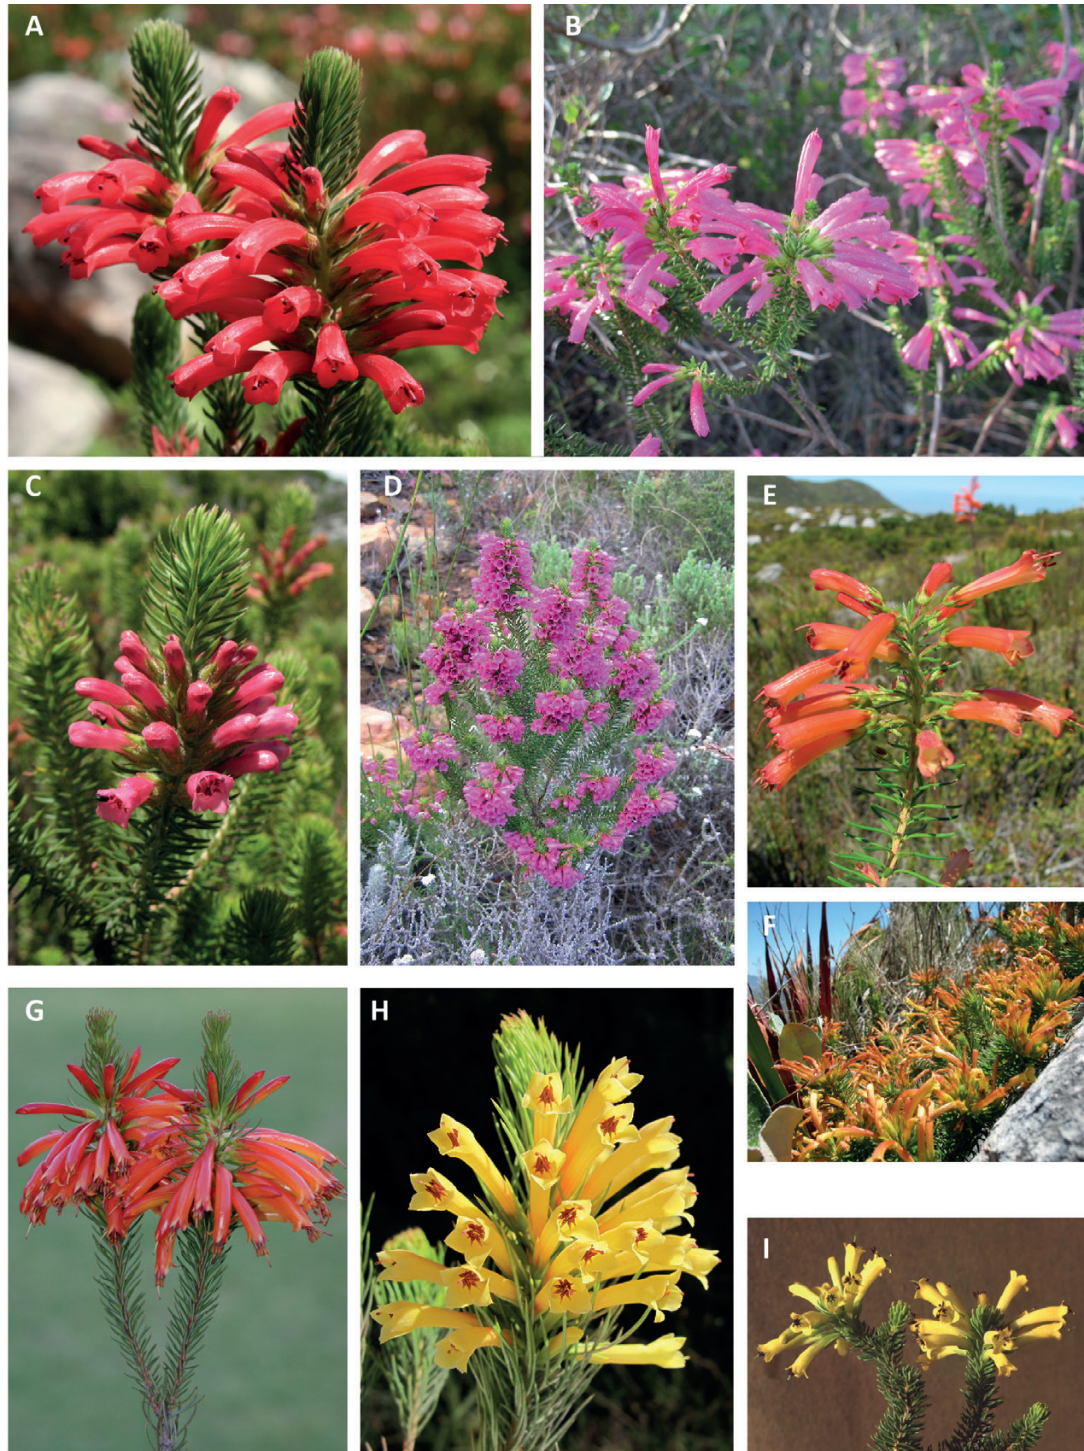

**Figure 1.** A–D, Cape Peninsula subspecies of *Erica abietina*: A, subsp. *abietina* (corolla dark red); B, subsp. *atrorosea* (MP1029) (corolla rose to deep rose); C, subsp. *diabolis* (MP1015) (corolla rose-pink); and D, subsp. *constantiana* (corolla pale to deeper rose-pink). E, *E. nevillei* (MP1056) (corolla red). F, *E. quadrisulcata* (MP1031) (corolla orange above, yellow underneath). G–I, extra-Cape Peninsula subspecies of *E. abietina*: G, subsp. *aurantiaca* (*E. grandiflora* subsp. *grandiflora*; MP514) (corolla orange to orange-red); H, subsp. *perfoliosa* (*E. grandiflora* subsp. *perfoliosa*; MP1071) (corolla pure yellow); and I, subsp. *petraea* (*E. situshiemalis*) (corolla pure yellow). Photographs: A, D, I: E.G.H.O.; B, C, E–H: M.D.P.

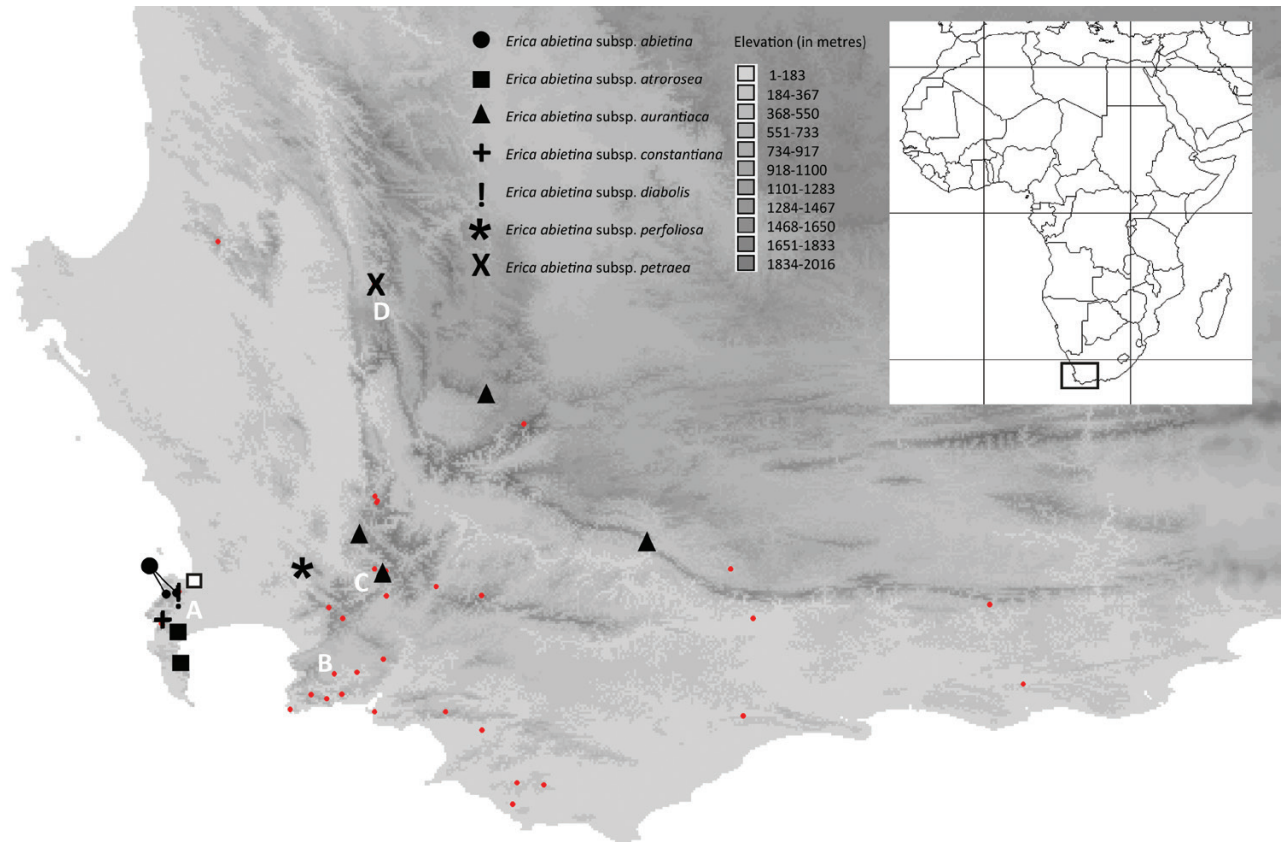

**Figure 2.** Distribution across the Cape Floristic Region (inset map indicates south-western position on the African continent) of ingroup samples included in phylogenetic analyses here. The subspecies of *Erica abietina sensu* Oliver & Oliver (2002) are represented with larger symbols as indicated and other taxa with smaller dots. A, Cape Peninsula (including the Table Mountain National Park); B, Kogelberg Biosphere reserve; C, Hottentots Holland Nature Reserve; and D, Groot Winterhoek Wilderness Area; the white square indicates central Cape Town.

As part of a renewed attempt to address taxonomic uncertainty in *Erica* systematically, we aim in this work to use molecular data to reassess species boundaries and patterns of regional endemism in the *abietinal/viscaria* clade, with particular focus on *E. abietina*. We test the monophyly of the species using independent nuclear and plastid DNA sequence datasets and implement the taxonomic consequences of the results.

## MATERIAL AND METHODS

### TAXON AND MOLECULAR SAMPLING

We based taxon sampling on the results of Pirie *et al.* (2011, 2016), together representing *c.* 60% of Cape *Erica* spp. from numerous localities across the CFR, further informed by our ongoing sampling efforts that at the time of writing cover *c.* 70% of known Cape species diversity (data not shown). In total, we sampled 64 accessions representing three outgroup and 25 ingroup species. The ingroup included all seven

subspecies of *E. abietina* (including three not previously analysed), both subspecies of *E. regia* Bartl., four of the six subspecies of *E. viscaria* and 22 other species (including *E. latiflora* L.Bolus; not previously analysed), with multiple accessions of several taxa to test their monophyly. Of section *Pleurocallis* (in which 13 of the ingroup species are classified), we have yet to sample *E. globulifera* Dulfer, *E. tenax* L.Bolus, *E. porteri* Compton and *E. onosmiflora* Salisb. Given the polyphyly of the section and lack of unambiguous synapomorphies for the *abietinal/viscaria* clade, we cannot assume that these belong to the clade or that they are the only members of that clade that we have not sampled. Our sampling probably roughly reflects our overall sampling of *Erica* spp. (*i.e.* *c.* 70%) and, given our broad coverage of localities across the CFR, we are likely to be missing predominantly rarer species and narrow regional endemics. The outgroups were *E. alopecurus* Harv., a more distant outgroup representative of the extra-CFR African clade (Pirie *et al.*, 2011), and *E. pycnantha* Benth. and *E. corifolia* L.,

both representatives of the *articularis* clade that is not part of the *abietinal/viscaria* clade (Pirie *et al.*, 2011) and is its probable sister group (Pirie *et al.*, 2016). Accession details are presented in Table 1 and the geographical distribution of ingroup samples is illustrated in Figure 2.

To assess the consistency of our phylogenetic hypothesis given the potential for gene tree conflict at and below the species level, we collected sequence data representing two independent gene trees: that of the plastid genome (plastid DNA) and that of one nuclear encoded marker, the *18S/5.8S/26S* nuclear ribosomal (nrDNA) gene region. We selected some individual markers (nrDNA ITS; plastid encoded *trnT-trnL-trnF-ndhJ* intron/intergenic spacer and *trnK-matK* spacer regions) based on their variability shown in previous work on *Erica* (Van der Niet *et al.*, 2014; Mugrabi de Kuppler *et al.*, 2015) and designed new primers to additionally sequence up to c. 800 bases of the nrDNA external transcribed spacer (ETS) region in order to obtain a more resolved nrDNA gene tree. Some ITS sequences were taken from Pirie *et al.* (2011) and some ITS and plastid sequences were taken from Pirie *et al.* (2016). All other data were generated newly for this study (Table 1).

#### DNA EXTRACTION, PCR AMPLIFICATION AND CYCLE SEQUENCING

We used two different laboratory protocols: (1) direct amplification (without DNA isolation) was performed using the method of Bellstedt *et al.* (2010), in particular when only nrDNA markers were to be sequenced; and (2) DNA isolation (followed by separate PCR) was performed using the DNeasy Plant Mini Kit (Qiagen, Hilden, Germany). In both cases, leaf material was ground using a Qiagen Tissuelyser (Retsch GmbH, Haan, Germany).

Primer design for ETS was initially accomplished by amplification and sequencing using primers *18S-ETS* (Baldwin & Markos, 1998) with *STT-ETS* (Li, Zhang & Alexander, 2001) and designing *Erica*-specific primers based on the resulting partial success. We subsequently performed long-range PCR using primers *18S-ETS* with *26S-IGS* (Baldwin & Markos, 1998) in order to design further primers for amplification and sequencing of longer fragments. These primers are documented in Table 2 (with the others used here) and in an aligned ETS matrix presented in Supporting Information Appendix S1. Amplification and sequencing of ETS for *Erica* accessions was performed using primer *18S\_ETS* in combination with either *ETS\_Erica1* (yielding a product of c. 600 bp) or *Erica\_813R* (c. 800 bp product), with reagents and protocol as for *18S-ETS/STT-ETS* below.

The reagents for PCR amplification were as follows and the thermocycler settings are reported in Table 2. For PCR with primers *18S-ETS* with *STT-ETS* per 25- $\mu$ L reaction we included 2.5  $\mu$ L Sigma 10 $\times$  buffer (Sigma-Aldrich, St Louis, MO, USA); 2.0  $\mu$ L 25 mM MgCl<sub>2</sub>, 1.0  $\mu$ L DMSO, 0.25  $\mu$ L 4  $\mu$ g/ $\mu$ L BSA, 0.5  $\mu$ L 10 mM dNTPs, 0.25  $\mu$ L each of 20  $\mu$ M forward and reverse primers, 0.1  $\mu$ L 5 U/ $\mu$ L Sigma Taq and 1.0  $\mu$ L template DNA. For long-range PCR using *18S-ETS* with *26S-IGS* we used the Phusion-High-Fidelity Polymerase Kit (New England Biolabs GmbH, Frankfurt am Main, Germany), including per 50- $\mu$ L reaction 10.0  $\mu$ L Phusion 5 $\times$  buffer, 1.5  $\mu$ L DMSO, 0.5  $\mu$ L 10 mM dNTPs, 0.5  $\mu$ L 4  $\mu$ g/ $\mu$ L BSA, 0.5  $\mu$ L each of 20  $\mu$ M forward and reverse primers, 0.5  $\mu$ L Phusion DNA polymerase and 2.0  $\mu$ L template DNA. For PCR of plastid markers and ITS sequences we included per 25- $\mu$ L reaction 2.5  $\mu$ L 10 $\times$  buffer, 2.0  $\mu$ L 25 mM MgCl<sub>2</sub>, 1.0  $\mu$ L 5 mM dNTPs, 0.25  $\mu$ L 4  $\mu$ g/ $\mu$ L BSA, 1  $\mu$ L DMSO (ITS only), 0.1  $\mu$ L Taq polymerase, 0.25  $\mu$ L each of 20  $\mu$ M solutions of the two primers and 1  $\mu$ L DNA template.

For direct sequencing, PCR products were treated in the original PCR tube by addition of a 10- $\mu$ L solution including 0.025  $\mu$ L of 20 units/ $\mu$ L exonuclease I (Fermentas Life Sciences, Burlington, ON, Canada), 0.25  $\mu$ L 1 unit/ $\mu$ L shrimp alkaline phosphatase (Promega, Madison, WI, USA) and incubation (in a thermocycler) at 37 °C for 30 min and at 95 °C for 5 min. Then 1  $\mu$ L of the resulting product was used for cycle-sequencing with the primers reported in Table 2, using Applied Biosystems (Foster City, CA, USA) Big Dye terminator kits according to the manufacturer's instructions. Cycle-sequencing products were analysed using an automatic sequencer 3130XL Genetic Analyzer (Applied Biosystems).

If direct sequencing resulted in ITS or ETS sequences with polymorphic sites, the corresponding amplicons were cloned using the pGEM-T Easy Vector Systems (Promega) to test whether the phylogenetic signals of the underlying copies differed. PCR and sequencing of clones was performed using the same primers and protocols as above.

#### ALIGNMENT AND PHYLOGENETIC ANALYSES

Sequences were aligned by eye in Mesquite (Maddison & Maddison, 2015). We performed preliminary phylogenetic analyses of markers separately under parsimony using PAUP\* and under maximum likelihood (ML) using RAxML (as below), to identify any differences within the plastid and nrDNA datasets that would indicate experimental error and to assess the phylogenetic signal of cloned ETS sequences. On confirming the monophyly of clones from single individuals (and identifying any exceptions), single sequences with congruent phylogenetic signal were arbitrarily

**Table 1.** Accessions details of vouchers for DNA samples, including GenBank accession numbers. Vouchers were lodged at NBG, and all were collected in the Western Cape, Republic of South Africa (RSA) with the exception of *E. alopecurus* (Free State; RSA). GenBank accession codes KY110749-KY110860 were newly generated for this work

| Taxon                                                                                                                                                                          | Locality                               | Voucher                               | Terminal                | ITS      | ETS      | <i>trnL-F-ndhJ</i> | <i>trnT-L</i> | <i>matK</i> |
|--------------------------------------------------------------------------------------------------------------------------------------------------------------------------------|----------------------------------------|---------------------------------------|-------------------------|----------|----------|--------------------|---------------|-------------|
| <i>Erica abietina</i><br>L. subsp.<br><i>abietina</i>                                                                                                                          | Cultivated: KBG                        | <i>Hitchcock, A,</i><br><i>156/94</i> | abietina_abi_<br>ANA    | KP737517 | KY110749 | KP737382           | KY110839      | KP737746    |
|                                                                                                                                                                                | Cape Peninsula,<br>Devil's Peak        | <i>Pirie, MD, 1013</i>                | abietina_abi_<br>MP1013 | HQ858885 | KY110750 | KU832577           | KU831802      |             |
|                                                                                                                                                                                | Cape Peninsula,<br>Table Mt.           | <i>Pirie, MD, 933</i>                 | abietina_abi_<br>MP933  | HQ858886 |          |                    |               |             |
| <i>Erica abietina</i><br>L. subsp.<br><i>atrorosea</i><br>E.G.H.Oliv.<br>& I.M.Oliv.                                                                                           | Cape Peninsula,<br>COGH. NR            | <i>Pirie, MD, 1029</i>                | abietina_atr_<br>MP1029 | KY110798 | KY110751 |                    | KY110840      |             |
|                                                                                                                                                                                | Cape Peninsula,<br>Silvermine          | <i>Pirie, MD, 950</i>                 | abietina_atr_<br>MP950  | HQ858888 |          |                    |               |             |
| <i>Erica abietina</i><br>L. subsp.<br><i>aurantiaca</i><br>E.G.H.Oliv.<br>& I.M.Oliv.<br>(= <i>E. grandiflora</i><br>L.f. subsp.<br><i>grandiflora</i> )                       | Du Toit's Pass                         | <i>Pirie, MD, 1320</i>                | abietina_aur_<br>MP1320 | KY110800 | KY110752 | KY110817           | KY110841      |             |
|                                                                                                                                                                                | Franschhoek                            | <i>Pirie, MD, 499</i>                 | abietina_aur_<br>MP499  | HQ858889 | KY110753 | KY110818           | KY110842      |             |
|                                                                                                                                                                                | Theronsberg Pass                       | <i>Pirie, MD, 514</i>                 | abietina_aur_<br>MP514  | HQ858890 | KY110754 | KY110819           | KY110843      |             |
|                                                                                                                                                                                | Near Montagu                           | <i>Pirie, MD, 717</i>                 | abietina_aur_<br>MP717  | KY110799 | KY110755 | KY110820           | KY110844      |             |
| <i>Erica abietina</i><br>L. subsp.<br><i>constantiana</i><br>E.G.H.Oliv. &<br>I.M.Oliv.                                                                                        | Cape Peninsula;<br>Chapman's Peak      | <i>Merry, C, 6</i>                    | abietina_con_<br>CM6    | KU832330 |          | KU832578           | KU831803      |             |
|                                                                                                                                                                                | Cape Peninsula                         | <i>Merry, C, 11</i>                   | abietina_dia_<br>CM11   | KU832331 |          | KU832579           | KU831804      |             |
| <i>Erica abietina</i><br>L. subsp.<br><i>diabolis</i><br>E.G.H.Oliv. &<br>I.M.Oliv.                                                                                            | Cape Peninsula,<br>Devil's Peak        | <i>Pirie, MD, 1015</i>                | abietina_dia_<br>MP1015 | HQ858887 | KY110756 | KY110821           | KY110845      |             |
|                                                                                                                                                                                | Stellenbosch,<br>Jonkershoek<br>valley | <i>Pirie, MD, 1071</i>                | abietina_per_<br>MP1071 | KY110801 | KY110757 | KY110822           | KY110846      |             |
| <i>Erica abietina</i><br>L. subsp.<br><i>perfoliosa</i> E.G.H.<br>Oliv. & I.M.Oliv.<br>(= <i>E. grandiflora</i><br>L.f. subsp.<br><i>perfoliosa</i><br>E.G.H.Oliv. &<br>Pirie) | Porterville area,<br>Groot Winterhoek  | <i>Oliver, EGH,</i><br><i>s.n.</i>    | abietina_pet_<br>EO     | KY110802 | KY110758 | KY110823           | KY110847      |             |
|                                                                                                                                                                                |                                        |                                       |                         |          |          |                    |               |             |

Table 1. Continued

| Taxon                                        | Locality                                              | Voucher                              | Terminal                 | ITS      | ETS      | <i>trnL-F-ndhJ</i> | <i>trnT-L</i> | <i>matK</i> |
|----------------------------------------------|-------------------------------------------------------|--------------------------------------|--------------------------|----------|----------|--------------------|---------------|-------------|
|                                              | Porterville area,<br>Groot Winterhoek                 | <i>Oliver, EGH,</i><br><i>11449</i>  | abietina_pet_<br>EO11449 | KY110803 | KY110759 |                    |               |             |
| <i>Erica alopecurus</i><br>Harv.             | Free Sate; Golden<br>Gate National<br>Park            | <i>Pirie, MD, 630</i>                | alopecurus_<br>MP630     | HQ858902 | KY110760 | KU832593           | KU831817      | KU831609    |
| <i>Erica axilliflora</i><br>Bartl.           | Carruthurs Hill                                       | <i>Pirie, MD, 916</i>                | axilliflora_<br>MP916    | HQ858929 | KY110761 | KU832619           | KU831841      |             |
| <i>Erica collina</i><br>Guthrie & Bolus      | Western Cape                                          | <i>Oliver, EGH,</i><br><i>12613</i>  | collina_<br>EO12613      | KU832372 |          | KU832680           | KU831896      |             |
| <i>Erica corifolia</i> L.                    | Kogelberg B.R.,<br>Kogelberg trail                    | <i>Pirie, MD, 823</i>                | corifolia_<br>MP823      | HQ858988 | KY110762 | KU832690           | KU831905      | KU831633    |
| <i>Erica cruenta</i><br>Soland.              | Near Kogelberg B.R.                                   | <i>Pirie, MD, 745</i>                | cruenta_MP745            | HQ858991 | KY110763 | KU832693           | KU831907      |             |
| <i>Erica cruenta</i><br>Soland.              | Rooihogte, N of<br>Villiersdorp                       | <i>Pirie, MD, 999</i>                | cruenta_MP999            | KY110804 | KY110764 | KY110824           | KY110848      |             |
| <i>Erica doliiformis</i><br>Salisb.          | Franschhoek                                           | <i>Pirie, MD, 710</i>                | doliiformis_<br>MP710    | HQ859017 | KY110765 | KY110825           | KY110849      |             |
|                                              | Limietberg NR,<br>Bain's Kloof                        | <i>Pirie, MD, 797</i>                | doliiformis_<br>MP797    | HQ859016 |          | KU832723           | KU831938      |             |
| <i>Erica elimensis</i><br>L.Bolus            | Cordale, Diepgat                                      | <i>Oliver, EGH,</i><br><i>12843</i>  | elimensis_<br>EO12843    | KU832399 |          | KU832730           |               |             |
| <i>Erica filamentosa</i><br>Andrews          | Swellendam,<br>Bontebok N.P.                          | <i>Oliver, EGH,</i><br><i>12728</i>  | filamentosa_<br>EO12728  | KU832405 | KY110766 | KU832753           | KU831966      |             |
| <i>Erica hibbertii</i><br>Andrews            | Franschhoek Pass<br>area, Purgatory/<br>Amandel River | <i>Oliver, EGH,</i><br><i>11952</i>  | hibbertii_<br>EO11952    | HQ859083 |          |                    |               |             |
|                                              | Boland/Overberg<br>border                             | <i>Pirie, MD, 982</i>                | hibbertii_<br>MP982      | KU832432 | KY110767 | KU832806           | KU832017      |             |
| <i>Erica latiflora</i><br>L.Bolus            | Elgin basin                                           | <i>Oliver, EGH,</i><br><i>12865</i>  | latiflora_<br>EO12865    | KY110805 | KY110768 | KY110826           |               |             |
| <i>Erica nematophylla</i><br>Guthrie & Bolus | Riversdale District,<br>Langeberg                     | <i>Oliver, EGH,</i><br><i>12747</i>  | nematophylla_<br>EO12747 | KU832483 | KY110769 | KU832907           | KU832112      |             |
| <i>Erica nevillei</i><br>L.Bolus             | Cultivated: KBG                                       | <i>Hitchcock, A,</i><br><i>86/04</i> | nevillei_ANA             | KY110806 | KY110770 | KY110827           | KY110850      |             |
|                                              | Cape Peninsula,<br>Noordhoek Piek<br>trail            | <i>Pirie, MD, 1056</i>               | nevillei_<br>MP1056      | KU832485 | KY110771 | KU832910           | KU832115      |             |
| <i>Erica parilis</i><br>Salisb.              | Cultivated: KBG                                       | <i>Hitchcock, A,</i><br><i>97/04</i> | parilis_ANA              | KY110807 | KY110772 | KY110828           | KY110851      |             |
|                                              | Hex River Mts,<br>Matroosberg                         | <i>Pirie, MD, 751</i>                | parilis_MP751            | HQ859177 | KY110773 | KU832932           | KU832137      |             |
| <i>Erica phillipsii</i><br>L.Bolus           | Piketberg                                             | <i>Pirie, MD, 1357</i>               | phillipsii_<br>MP1357    | KY110808 | KY110774 | KY110829           | KY110852      |             |
|                                              | Limietberg NR,<br>Bain's Kloof                        | <i>Pirie, MD, 794</i>                | phillipsii_<br>MP794     | HQ859199 | KY110775 | KU832957           | KU832161      |             |
| <i>Erica pinea</i><br>Thunb.                 | Franschhoek                                           | <i>Pirie, MD, 693</i>                | pinea_MP693              | KY110809 | KY110776 | KY110830           | KY110853      |             |
|                                              | Limietberg NR,<br>Bain's Kloof                        | <i>Pirie, MD, 789</i>                | pinea_MP789              | HQ859204 | KY110777 | KU832963           | KU832166      |             |
| <i>Erica pycnantha</i><br>Benth.             | Kogelberg B.R.,<br>Perdeberg                          | <i>Pirie, MD, 1011</i>               | pycnantha_<br>MP1011     | KU832513 | KY110778 | KU832984           | KU832190      |             |
| <i>Erica quadrisulcata</i><br>L.Bolus        | Cultivated: KBG                                       | <i>SANBI,</i><br><i>543/87</i>       | quadrisulcata_<br>ANA    | KY110810 | KY110779 | KY110831           | KY110854      |             |
|                                              | Cape Peninsula,<br>COGH. NR                           | <i>Pirie, MD, 1031</i>               | quadrisulcata_<br>MP1031 | KU832515 | KY110780 | KU832987           | KU832193      |             |

**Table 1.** *Continued*

| Taxon                                                                                                   | Locality                                                            | Voucher                        | Terminal                 | ITS      | ETS      | <i>trnL-F-ndhJ</i> | <i>trnT-L</i> | <i>matK</i> |
|---------------------------------------------------------------------------------------------------------|---------------------------------------------------------------------|--------------------------------|--------------------------|----------|----------|--------------------|---------------|-------------|
| <i>Erica regia</i><br>Bartl. subsp.<br><i>mariae</i> (Guthrie<br>& Bolus)<br>E.G.H.Oliv. &<br>I.M.Oliv. | Riversdale Distr.,<br>between<br>Melkhoutfontein<br>and Gouritsmond | <i>Gehrke, B, 580</i>          | regia_mar_<br>BG580      | HQ859235 |          |                    |               |             |
|                                                                                                         | De Hoop NR                                                          | <i>Pirie, MD, 930</i>          | regia_mar_<br>MP930      | HQ859236 | KY110781 | KU832995           | KU832201      |             |
| <i>Erica regia</i> Bartl.<br>subsp. <i>regia</i>                                                        | Geelrug (cult.: KBG)                                                | <i>SANBI,<br/>1613/70</i>      | regia_reg_ANA            | KU832518 | KY110782 | KU832996           | KU832202      | KU831696    |
|                                                                                                         | Viljoenshof to Elim                                                 | <i>Oliver, EGH,<br/>11404</i>  | regia_reg_<br>EO11404    | HQ859238 |          |                    |               |             |
|                                                                                                         | Elim area,<br>Waterford                                             | <i>Oliver, EGH,<br/>12275</i>  | regia_reg_<br>EO12275    | HQ859239 |          |                    |               |             |
|                                                                                                         | Viljoenshof to Elim                                                 | <i>Pirie, MD, 922</i>          | regia_reg_<br>MP922      | HQ859237 | KY110783 | KU832997           | KU832203      |             |
| <i>Erica stokoei</i><br>L.Bolus                                                                         | Cultivated: KBG                                                     | <i>Unknown,<br/>62/83</i>      | stokoei_ANA              | KY110811 | KY110784 | KY110832           | KY110855      |             |
|                                                                                                         | Kogelberg B.R.,<br>Kogelberg trail                                  | <i>Pirie, MD, 825</i>          | stokoei_MP825            | HQ859285 | KY110785 | KU833050           | KU832256      |             |
| <i>Erica thomae</i><br>L.Bolus                                                                          | Kogelberg B.R.,<br>Kogelberg trail                                  | <i>Pirie, MD, 807</i>          | thomae_MP807             | HQ859297 | KY110786 | KU833068           | KU832272      | KU831712    |
| <i>Erica vestita</i><br>Thunb.                                                                          | Cultivated: KBG                                                     | <i>SANBI,<br/>176/05</i>       | vestita_ANA              | KU832567 | KY110787 | KU833111           | KU832313      | KU831720    |
|                                                                                                         | Riviersonderend<br>Mts, Jonaskop                                    | <i>Bytebier, B,<br/>2667</i>   | vestita_BB2667           | HQ859327 |          |                    |               |             |
|                                                                                                         | Langeberg Mts                                                       | <i>Muasya, AM,<br/>4468</i>    | vestita_CS4468           | HQ859328 |          |                    |               |             |
|                                                                                                         | Klein River Mts;<br>Glengart/<br>Morning Star                       | <i>Oliver, EGH,<br/>12702</i>  | vestita_<br>EO12702      | KU832568 | KY110788 | KU833112           | KU832314      |             |
|                                                                                                         | Langeberg Mts;<br>Marloth NR                                        | <i>Pirie, MD, 1079</i>         | vestita_<br>MP1079       | KY110812 | KY110789 | KY110833           | KY110856      |             |
|                                                                                                         | Pearly Beach;<br>Heidehof                                           | <i>Pirie, MD, 910</i>          | vestita_MP910            | HQ859329 |          |                    |               |             |
|                                                                                                         | Cultivated: KBG                                                     | <i>Hitchcock, A,<br/>91/04</i> | viscaria_lon_<br>ANA     | KY110814 | KY110790 | KY110838           | KY110857      |             |
| <i>Erica viscaria</i><br>L. subsp. <i>longi-<br/>folia</i> (Bauer)<br>E.G.H.Oliv. &<br>I.M.Oliv.        | Hottentots Holland<br>NR                                            | <i>Pirie, MD, 1270</i>         | viscaria_lon_<br>MP1270  | KY110813 | KY110791 | KY110835           | KY110859      |             |
|                                                                                                         | Franschhoek                                                         | <i>Pirie, MD, 504</i>          | viscaria_lon_<br>MP504   | HQ859331 | KY110792 | KY110834           | KY110858      |             |
|                                                                                                         | Stellenbosch,<br>Jonkershoek                                        | <i>Pirie, MD, 678</i>          | viscaria_lon_<br>MP678   | HQ859332 |          | KU833115           | KU832317      |             |
| <i>Erica viscaria</i><br>L. subsp. <i>macrosepala</i><br>E.G.H.Oliv. &<br>I.M.Oliv.                     | Babylon's Tower                                                     | <i>Pirie, MD, 682</i>          | viscaria_mac_<br>MP682   | KY110815 | KY110793 | KY110836           | KY110860      |             |
|                                                                                                         | Kogelberg B.R.,<br>Kogelberg trail                                  | <i>Pirie, MD, 808</i>          | viscaria_mac_<br>MP808   | HQ859333 | KY110794 | KU833116           | KU832318      |             |
| <i>Erica viscaria</i><br>L. subsp. <i>pendula</i><br>E.G.H.Oliv.<br>& I.M.Oliv.                         | Bot River,<br>Highlands road                                        | <i>Oliver, EGH,<br/>12466</i>  | viscaria_pen_<br>EO12466 | HQ859334 | KY110795 | KU833117           | KU832319      |             |



**Table 1.** *Continued*

| Taxon                                                 | Locality       | Voucher                   | Terminal                  | ITS      | ETS      | <i>trnL-F-ndhJ</i> | <i>trnT-L</i> | <i>matK</i> |
|-------------------------------------------------------|----------------|---------------------------|---------------------------|----------|----------|--------------------|---------------|-------------|
|                                                       | Houw Hoek      | <i>Pirie, MD, 603</i>     | <i>viscaria_pen_MP603</i> | KY110816 | KY110796 | KY110837           |               |             |
| <i>Erica viscaria</i><br>L. subsp.<br><i>viscaria</i> | Cape Peninsula | <i>Villiers, MJ de, 4</i> | <i>viscaria_vis_MdV4</i>  | HQ859335 | KY110797 | KU833118           | KU832320      |             |

**Table 2.** Primers used for PCR and sequencing

| Marker                            | Primers                                                                                                           | Thermocycler protocol                                                                                             |
|-----------------------------------|-------------------------------------------------------------------------------------------------------------------|-------------------------------------------------------------------------------------------------------------------|
| ETS (general)                     | 18S-ETS (Baldwin & Markos, 1998)/<br>STT-ETS (Li <i>et al.</i> , 2001)                                            | 97 °C 2 min; 40 cycles (97 °C<br>10 s/55 °C 30 s/72 °C 25 s);<br>72 °C 7 min                                      |
| ETS (long<br>range)               | 18S-ETS / 26S-IGS (Baldwin &<br>Markos, 1998)                                                                     | 98 °C 45 s; 30 cycles (98 °C<br>10 s/72 °C 4 min); 72 °C<br>10 min                                                |
| ETS ( <i>Erica</i> -<br>specific) | 18S_ETS/<=GGCAAGCACCGTTTA<br>GCATGAACA=ETS_Erica1;<br><=GCCCCGTGGCATCACTTTCCAACG<br>=ETS_Erica_813R (this study)  | 97 °C 2 min; 40 cycles (97 °C<br>10 s/55 °C 30 s/72 °C 25 s);<br>72 °C 7 min                                      |
| ITS                               | AB101 (Douzery <i>et al.</i> , 1999)/8P (Möller<br>& Cronk, 1997); ITS17se/ ITS26se<br>(Sun <i>et al.</i> , 1994) | 94 °C 1 min; 35 cycles (94 °C<br>1 min/55 °C 1 min/72 °C<br>2 min); 72 °C 4 min                                   |
| <i>trnT-L</i>                     | a/b (Taberlet <i>et al.</i> , 1991)                                                                               | 80 °C 5 min; 30 or 35 cycles<br>(95 °C 1 min/50 °C 1 min/<br>ramp 0.38 °C/s to 65 °C/65 °C<br>4 min); 5 min 65 °C |
| <i>trnL-ndhJ</i>                  | c/f (Taberlet <i>et al.</i> , 1991); e (Taberlet <i>et al.</i> ,<br>1991)/ndhJ (Shaw <i>et al.</i> , 2007)        | As above                                                                                                          |
| <i>trnK-matK</i>                  | matK6 (Shaw <i>et al.</i> , 2005)/ matK79R<br>(Mugrabi de Kuppler <i>et al.</i> , 2015)                           | As above                                                                                                          |

retained for combined analyses. Individual markers were imported into SequenceMatrix (Vaidya, Lohman & Meier, 2011), which was used to export concatenated matrices (nrDNA, plastid DNA and all) for further analyses (TreeBase study accession URL: <http://purl.org/phylo/treebase/phyloids/study/TB2:S18985>).

For each of the three concatenated matrices the best fitting data partitioning strategies (given models implemented in RAxML and MrBayes as below) were selected with PartitionFinder (Lanfear *et al.*, 2012), using a heuristic search strategy ('greedy') and comparison of fit by means of the Bayesian information criterion. Genes, introns and spacer regions within those markers were specified as potential data partitions, with plastid DNA genes combined in a single partition because the data were missing for many of the taxa (see Results). Analyses were restricted to 44 taxa for which a minimum of 1 kb of sequence data had been generated.

To infer gene tree topologies and clade support, analyses of nrDNA and plastid DNA matrices were

performed under parsimony, using PAUP\* (Swofford, 2003), maximum likelihood (ML) using RAxML (Stamatakis, 2006) and Bayesian inference using MrBayes 3.2 (Ronquist *et al.*, 2012). To find the shortest trees, we employed a heuristic search strategy in PAUP\* involving 1000 random addition sequences with TBR branch swapping, saving a maximum of 50 trees in each replicate. To assess parsimony clade support, we performed 10 000 bootstrap replicates starting each with a single random addition sequence and implementing TBR branch swapping, saving a single tree per replicate (following Müller, 2005). Partitioned RAxML analyses were performed including bootstrapping on CIPRES (Stamatakis, Hoover & Rougemont, 2008). Bootstrapping was halted automatically following the majority-rule 'autoMRE' criterion and bootstrap support (BS) was presented on the best scoring ML tree. Two independent MrBayes runs of 10 million generations each were performed, sampling every 1000 generations, implementing the partitions and substitution models as selected using PartitionFinder. Convergence

was assessed (using the potential scale reduction factor, PSRF) and post-burnin tree samples were summarized (using the `sumt` command) in MrBayes.

Conflict between nrDNA and plastid DNA gene trees was assessed by comparing nodes subject to 70% or higher BS and/or 0.95 posterior probability (PP) and visualized by means of a tanglegram of strict consensus trees generated using Dendroscope 3 (Huson & Scornavacca, 2012). Where gene tree conflict was identified, the taxa with conflicting phylogenetic signals were removed prior to concatenated analyses under parsimony, ML and Bayesian inference, as above. Taxa that were represented by < 1 kbp of sequence data (i.e. in some cases only ITS sequences were available from Pirie *et al.* 2011; Supporting Information Appendix S2) were also excluded.

## RESULTS

A comparison of the variability of the main molecular markers used is presented in Table 3. The nrDNA markers yielded at least double the number of potentially parsimony-informative characters per PCR amplicon/sequence compared to the plastid DNA markers, and the newly developed ETS protocol yielded 20% more potentially informative and 85% more variable, uninformative characters than ITS.

No polymorphisms were apparent in electropherograms resulting from direct sequencing of ITS PCR products. In contrast, up to four polymorphic sites per sequence were apparent in the ETS electropherograms of five samples: *E. hibbertii* Andrews sample MP982, *E. abietina* subsp. *petraea* sample EO, *E. abietina* subsp. *aurantiaca* samples MP514 and MP717, and *E. viscaria* subsp. *macrosepala* E.G.H.Oliv. & I.M.Oliv. sample MP682. The corresponding PCR products were therefore cloned. Preliminary analyses showed generally consistent phylogenetic signal (no conflict supported by  $\geq 70\%$  BS) between individual plastid DNA markers and between nrDNA ITS and ETS. Two clones of *E. abietina* subsp. *aurantiaca* (one each of samples MP717 and MP514) did not exhibit this within-locus

tree consistency. These differed in phylogenetic signal both from other ETS clones and from ITS sequences of the same sample, implying a sister-group relationship to the 'abietina clade', as opposed to being nested in the 'viscaria clade' (as defined below; Supporting Information Appendix S3). Single arbitrarily chosen ETS clones per sample were retained for combined analyses, excluding the incongruent clones of MP717 and MP514. The best fitting substitution models and partitioning strategies inferred using PartitionFinder given models available under RAxML and MrBayes for the plastid DNA, nrDNA and all concatenated data are reported in Table 4.

Combination of individual plastid DNA and nrDNA markers resulted in better resolved plastid DNA and nrDNA gene trees; these are compared in the tanglegram in Figure 3, with BS from PAUP\* and RAxML and PP clade support values from MrBayes analyses. Most nodes subject to  $\geq 70\%$  BS and/or 0.95 PP were consistent between gene trees, with the exception of those subtending five samples representing *E. cruenta* Soland., *E. stokoei* L.Bolus and *E. collina* Guthrie & Bolus (which nrDNA placed outside the ingroup) and one of *E. phillipsii* L.Bolus (conflict within the ingroup; Fig. 3). Clade support differed somewhat according to the different methods, but both plastid DNA and nrDNA trees feature a Cape Peninsula endemic 'abietina clade', comprising *E. abietina* subsp. *abietina*, *E. abietina* subsp. *atrorosea* E.G.H.Oliv. & I.M.Oliv., *E. abietina* subsp. *constantiana*, *E. abietina* subsp. *diabolis*, *E. quadrisulcata* L.Bolus and *E. nevillii* L.Bolus, to the exclusion of accessions of *E. abietina* subsp. *petraea*, *E. abietina* subsp. *aurantiaca* and *E. abietina* subsp. *perfoliosa*. Both genes trees show the last two subspecies to be more closely related to accessions of *E. viscaria* and other species, which in the nrDNA tree are grouped in a larger 'viscaria clade' (Fig. 3).

The phylogenetic hypothesis based on concatenated plastid DNA and nrDNA sequence data (excluding the above taxa with conflicting phylogenetic signals) is presented in Figure 4. The topology is consistent with both

**Table 3.** Variability and potentially informative characters of molecular markers (excluding the generally less variable *trnL* intron and *trnK-matK* spacer/gene, for which fewer accessions were sequenced) across a directly comparable subset of 44 taxa

| Marker                        | Aligned                             | Constant | Parsimony-uninformative | Potentially parsimony-informative |
|-------------------------------|-------------------------------------|----------|-------------------------|-----------------------------------|
| ITS                           | 905 (plus 3 indels)                 | 832      | 41                      | 35                                |
| ETS                           | 825 (plus 2 indels)                 | 709      | 76                      | 42                                |
| <i>trnT-trnL</i>              | 1328 (1070 included, plus 4 indels) | 1006     | 52                      | 16                                |
| <i>trnL-trnF-ndhJ</i> spacers | 1000 (plus 4 indels)                | 953      | 39                      | 12                                |

**Table 4.** Best fitting partitions and substitution models

| Matrix/method       | RAxML                                                                                                                                                                                      | MrBayes                                                                                                                                                                                                  |
|---------------------|--------------------------------------------------------------------------------------------------------------------------------------------------------------------------------------------|----------------------------------------------------------------------------------------------------------------------------------------------------------------------------------------------------------|
| plastid DNA         | GTR+G (unpartitioned)                                                                                                                                                                      | (1) F81+G: <i>trnTL</i><br>(2) F81+G: plastid DNA genes, <i>trnF-ndhJ</i> , <i>trnK-matK</i> , <i>trnL</i> intron, <i>trnL-trnF</i>                                                                      |
| nrDNA               | (1) GTR+G: 18S, ITS1, 5.8S, ITS2, 28S<br><br>(2) GTR+G: ETS                                                                                                                                | (1) JC: 18S, 5.8S<br>(2) K80+G: ITS1, ITS2<br>(3) HKY+G: 28S, ETS                                                                                                                                        |
| plastid DNA + nrDNA | (1) GTR+G: 18S, 28S, 5.8S, ITS1, ITS2<br><br>(2) GTR+G: ETS<br><br>(3) GTR+G: plastid DNA genes, <i>trnF-ndhJ</i> , <i>trnK-matK</i> , <i>trnL</i> intron, <i>trnL-trnF</i> , <i>trnTL</i> | (1) JC: 18S, 5.8S<br>(2) K80+G: ITS1, ITS2<br>(3) HKY+G: 28S, ETS<br>(4) GTR+G: <i>trnTL</i><br>(5) F81+G: plastid DNA genes, <i>trnF-ndhJ</i> , <i>trnK-matK</i> , <i>trnL</i> intron, <i>trnL-trnF</i> |

individual gene trees (minus the conflicting elements). There is significant ( $\geq 70\%$  BS;  $\geq 0.95$  PP) or strong support (depending on the phylogenetic method) for monophyly of the *abietina/viscaria* clade. A sister-group relationship of *E. parilis* Salisb. with the rest of the clade is supported under Bayesian inference; the clade otherwise comprises a basal polytomy also including *E. thomae* L.Bolus; *E. abietina* subsp. *petraea*; the '*abietina* clade'; *E. phillipsii* and *E. doliiformis* Salisb. (two smaller-flowered species that according to the likelihood-based methods represent a clade sister to the *abietina*-clade), and the *viscaria*-clade (comprising the remaining species). The Cape Peninsula subspecies of *E. abietina* are a monophyletic group nested in the *abietina* clade.

## DISCUSSION

Phylogenetic approaches using DNA sequence data are an invaluable tool for addressing the challenges involved in revising large genera (Williams *et al.*, 2014). Species boundaries can in principle be tested using a modest number of molecular markers and standard phylogenetic inference methods, even in a complex group such as the *E. abietina/viscaria* clade. When particular populations prove to be only distantly related to their putative conspecifics (confirmed by data from independent linkage groups), this supports their recognition as distinct species. However, given coalescent stochasticity within populations and hybridization between them, lower-level taxa (particularly at and below the species level) might not be expected to be monophyletic according to all (or even any) given molecular markers (Doyle, 1992; Maddison, 1997). In the face of species paraphyly without clear gene tree congruence, coalescence-based species delimitation approaches based on multiple independent markers (Maddison, 1997; Fujita *et al.*, 2012; Naciri &

Linder, 2015) would be a necessary basis for any taxonomic conclusions. Both scenarios are apparent in our results. There are distantly related clades representing geographically disjunct and morphologically distinct populations of taxa (currently recognized under *E. abietina*). There is also evidence of putative lineage sorting artefacts and/or past reticulation in the form of limited gene tree conflict (Fig. 3; Supporting Information Appendix S3) and paraphyly of taxa, particularly in the poorly resolved *viscaria* clade (Fig. 4).

Discussing *E. abietina*, Oliver & Oliver (2002) documented the characteristics common to the species as they defined it (e.g. similar inflorescence structure, apiculate leaves, sepals with sessile glands on the margins), but emphasized its variability, particularly in the size, colour, indumentum and stickiness of the flowers, the degree of inclusion/exsertion of the stamens, the shape of the anthers, the length of the leaves and its habitat preferences. In particular, they noted the range of flower colours (red, orange-red, orange, deep pink, pink or yellow) stating, 'In the fresh state these colours are very distinctive, and would clearly lead one to use them as specific characters, but in dried material without colour notes, identification is nigh impossible and one has to resort to a few morphological characters'. Despite the wide colour variation across the clade as a whole, these distinctive colours are characteristic of lineages identified in our analyses: in particular, red to pink for the Cape Peninsula subspecies of *E. abietina* (Fig. 1A–D) as opposed to orange to orange-red for *E. abietina* subsp. *aurantiaca* (Fig. 1G; and *abietina* clade species *E. quadrisulcata* and *E. nevillei*; Fig. 1E, F) and yellow for *E. abietina* subsp. *perfoliosa* (Fig. 1H) and *petraea* (Fig. 1I). All but one subspecies of *E. abietina* were reported to exhibit sessile glands on the adaxial side of the calyx in the middle zone next to the margins, the notable exception being *E. abietina* subsp. *petraea*.

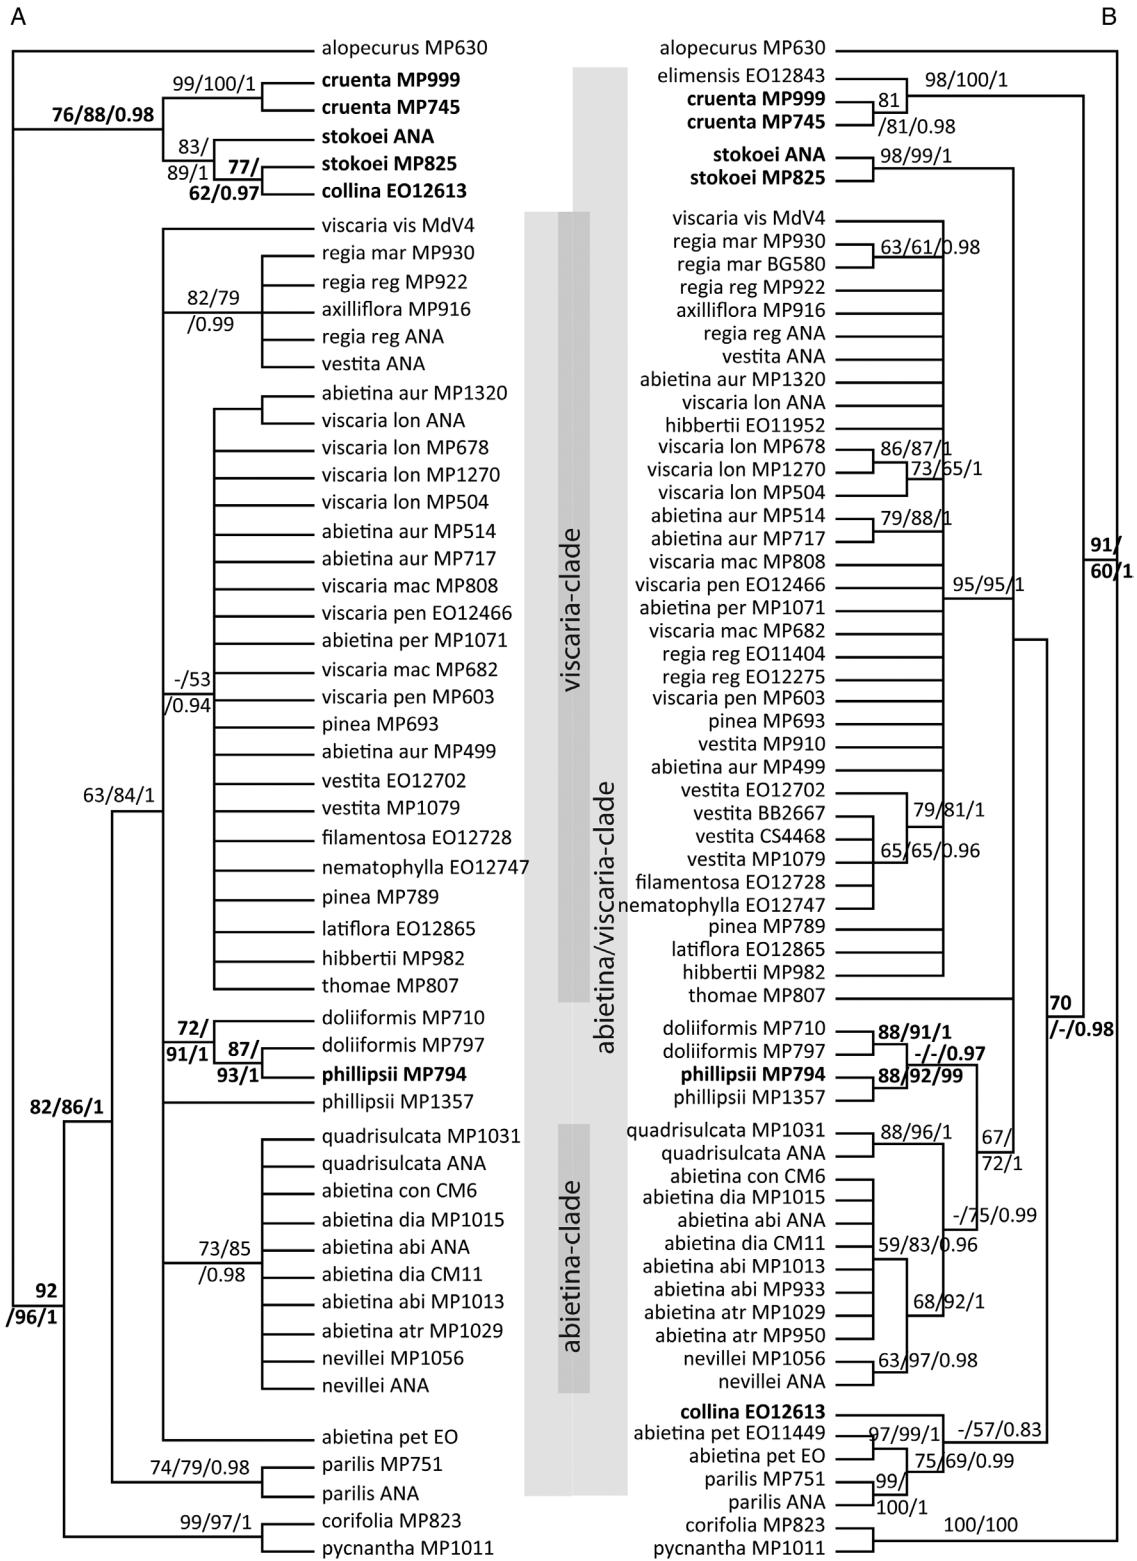

**Figure 3.** A tangram comparing (A) plastid DNA and (B) nrDNA gene trees with values above the branches representing bootstrap support (BS) under parsimony (using PAUP\*) and maximum likelihood (ML; RAxML) and posterior probabilities (PP) from Bayesian inference (MrBayes; from left to right parsimony BS/ML BS/PP). Conflicting taxa and nodes are indicated in bold type.

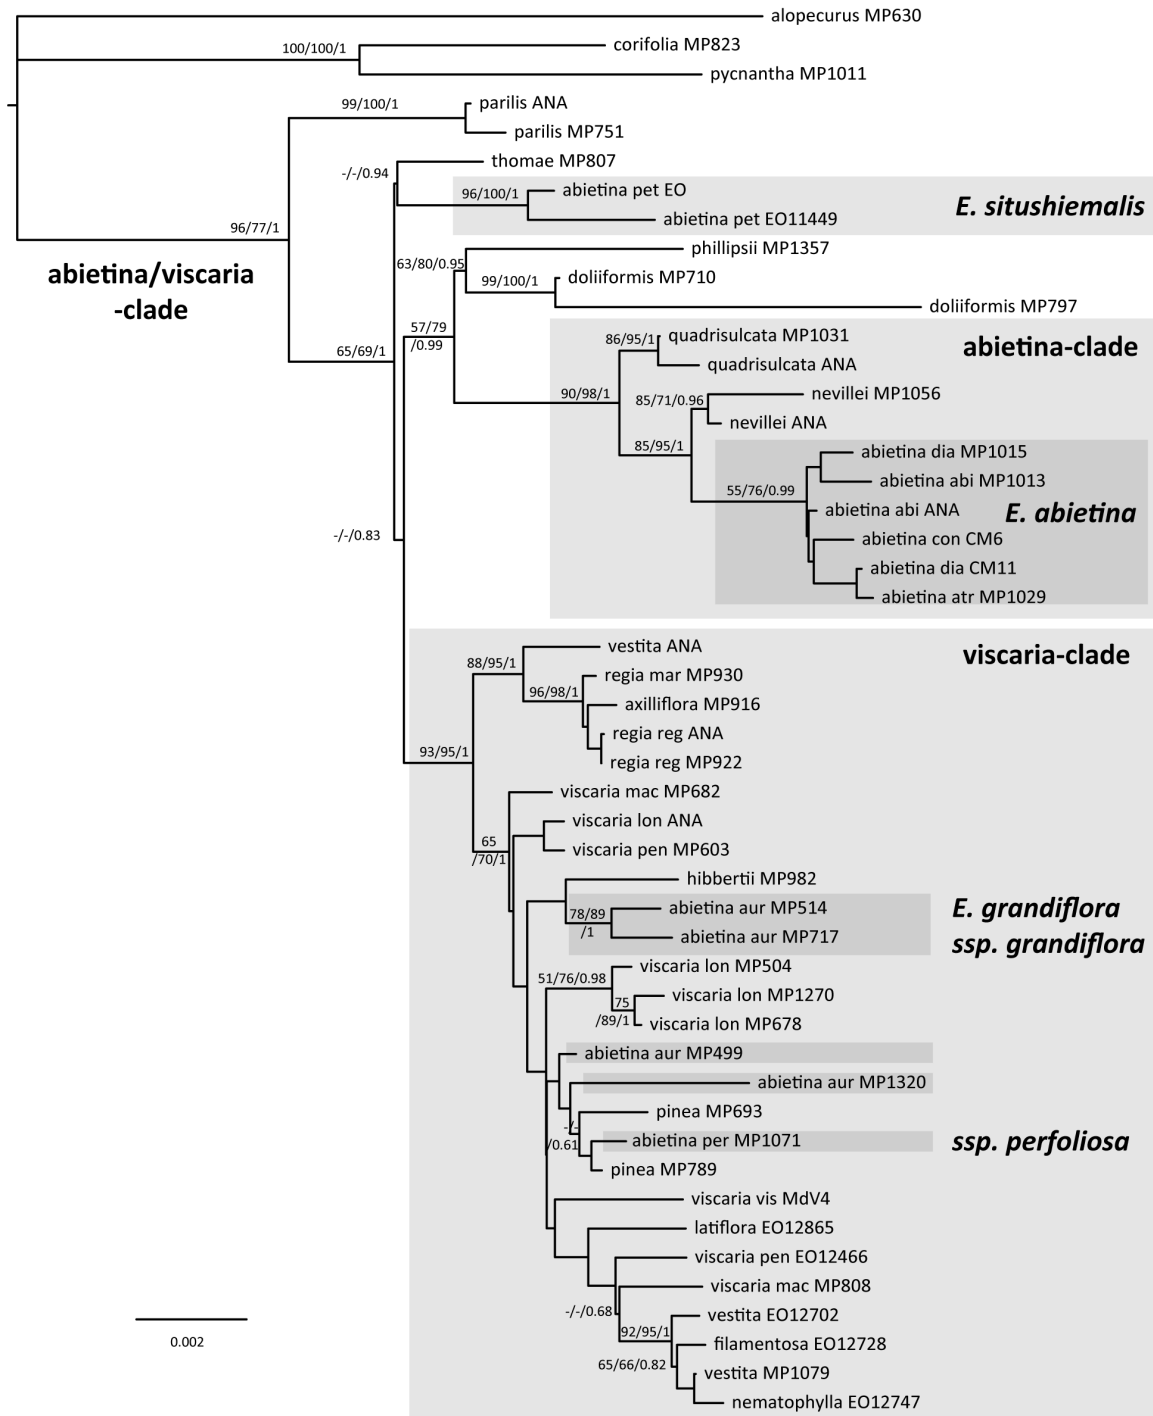

Downloaded from https://academic.oup.com/botlinnean/article/184/2/185/3865477 by guest on 24 April 2024

**Figure 4.** The phylogenetic hypothesis based on concatenated (congruent) plastid DNA and nrDNA sequence data. The tree is the best found under maximum likelihood (ML) using RAxML, with branch lengths in substitutions per site. Values above the branches represent bootstrap support (BS) under parsimony (using PAUP\*) and ML (RAxML) and posterior probabilities (PP) from Bayesian inference (MrBayes; from left to right parsimony BS/ML BS/PP).

The further distinctiveness of the Cape Peninsula species was also noted: ‘The [Cape] Peninsula taxa tend to form a group having the apex of the corolla

lobes a little more rounded, whereas the taxa from the mainland have more acute apices to the corolla lobes’ (Oliver & Oliver, 2002).

*Erica abietina sensu* Oliver & Oliver (2002) thus comprises at least three morphologically distinct and geographically disjunct lineages that are more closely related to other lineages in the *E. abietina/viscaria* clade than they are to each other. In the taxonomic treatment that we present here, we therefore segregate *E. abietina* into three species. We redefine *E. abietina s.s.* as a Cape Peninsula endemic including four existing subspecies and we describe one new species for the distantly related Groot Winterhoek Mountains endemic *E. abietina* subsp. *petraea* (*E. situshiemalis* E.G.H.Oliv. & Pirie stat. & nom. nov.). We reinstate the previous name *E. grandiflora* L.f. for the widespread (outside the Cape Peninsula) and variable *E. abietina* subsp. *aurantiaca*, including in it, on exclusively morphological grounds (the combination of acute corolla lobes and adaxial sessile glands on the calyx), *E. abietina* subsp. *perfoliosa* as a second subspecies. In effect, the morphological justifications for these alternative species delimitations were presented in Oliver & Oliver (2002). The main difference between their taxonomy and that informed by our phylogenetic evidence lies in the relative importance of characters in terms of taxonomic rank.

However, the phylogenetic hypothesis for the *viscaria* clade, which includes *E. grandiflora*, is not easily translated into a classification. Resolution is limited in both independent gene trees and there is a lack of obvious species monophyly. Indeed, the widespread but easily recognized *E. vestita* is apparently paraphyletic, with two accessions strongly supported in a clade with the single accessions of *E. filamentosa* and *E. nematophylla* and the third accession in a separate subclade that also includes the two subspecies of *E. regia* and the single accession of *E. axilliflora*. These factors suggest that data representing multiple independent and meaningfully resolved gene trees will be needed to address uncertainty in species boundaries in this complex and that concatenation approaches as employed here may not be an appropriate means of analysing them (Pirie, 2015). Adding to this phylogenetic uncertainty, the possibility that the group harbours more taxonomic entities than have been recognized to date was mooted by Oliver & Oliver (2002), who wrote of *E. viscaria* subsp. *longifolia*: ‘This is the most variable subspecies, which it may, on more detailed population studies coupled with molecular analyses, be possible to divide into more subspecific taxa’. Despite the clear need for further work on the *viscaria* clade, among its species only the name *E. viscaria* L. (Linnaeus & Dahlgren, 1770) is older than *E. grandiflora* L.f. (Linnaeus, 1782) and our results do not indicate that these two species are any more closely related to each other than they are to any other species in the complex. Hence we predict that our reinstatement of *E. grandiflora* for *E. abietina* subsp. *aurantiaca* is likely to be

robust. By including *E. abietina* subsp. *perfoliosa* in *E. grandiflora* we seek to restrict taxonomic changes to the minimum necessary to address the polyphyly of *E. abietina sensu* Oliver & Oliver (2002).

Despite its small area (only 49 000 ha; Rebelo *et al.*, 2006), the Cape Peninsula is a region of high plant species endemism in general (Oliver, Linder & Rourke, 1983; Simmons & Cowling, 1996; Trinder-Smith *et al.*, 1996; Helme & Trinder-Smith, 2006) and one for *Erica* spp. and subspecies of *E. abietina* in particular (Oliver & Oliver, 2000). In the Cape Peninsula, Trinder-Smith *et al.* (1996) counted 2285 indigenous vascular plant species (representing according to them the greatest concentration of plant species per unit area in the CFR) and Helme & Trinder-Smith (2006) reported 158 endemic species and three endemic subspecies (7% of the flora). The most species-rich genus in the Cape Flora as a whole, *Erica*, is also represented by the greatest number of endemic species on the Cape Peninsula: 35 according to recent estimates (E. G. H. Oliver, unpubl. data), now including *E. abietina* as newly defined here.

In the *abietina/viscaria* clade our results show examples of putative diversification in the Cape Peninsula (the endemic Peninsula *abietina* clade) and independent origins of Cape Peninsula lineages (*E. viscaria* subsp. *viscaria*, also endemic to the Cape Peninsula but nested in the *viscaria* clade; Fig. 4). The Cape Peninsula can therefore be regarded as a local ‘hotbed’ of speciation and of the evolutionary process (Cowling & Pressey, 2001) and as a repository of phylogenetic diversity (Forest *et al.*, 2007) derived from the wider CFR. Both attributes serve to emphasize the conservation importance of the protected areas of the Cape Peninsula, most notably Table Mountain National Park. *Erica* is spectacularly diverse in the CFR biodiversity hotspot and our results suggest that its true richness may be even higher than currently recognized. Given the complex morphological variation typical of hyper-diverse groups such as Cape *Erica*, molecular tools offer invaluable insight into species boundaries and patterns of endemism. The implications of these results are that the status of geographically restricted and morphologically distinct populations of *Erica* in the CFR (as reflected in numerous taxa described at subspecific ranks) should be critically assessed in the context of the phylogenetic diversity of related species. By identifying more of the cryptic narrowly endemic species diversity that survive in the nature reserves and national parks of the remarkable CFR we hope to further highlight the importance of ongoing support for their protection and appropriate management.

#### TAXONOMIC TREATMENT

We treat only the (former) taxa of *E. abietina*, with additional comparison to closely related species.

Characters distinguishing *E. abietina*, *E. grandiflora* and *E. situshiemalis* are indicated with bold type. Diagnostic features and distributions are adapted from Oliver & Oliver (2002) and Oliver & Forshaw (2012), of which the former can be referred to for additional voucher material, illustrations and notes and the latter for comparisons to more distantly related taxa. Conservation status follows Raimondo *et al.* (2009); <http://redlist.sanbi.org/index.php> (last accessed 7 November 2016).

***Erica abietina*** L. Species plantarum edn 1, 1: 355 (1753); Salter: 634 (1951); Dulfer: 37 (1965); Oliv. & Oliv. (2002). Lectotype: '*Erica Africana, Abietis folio longiore & tenuiore, floribus oblongis, saturate rubris*' in Seba, Locupl. Rer. Nat. Thes. 1; 31, t.21, f.1, 1734 (designated by Oliver: 497; 2007).

**Diagnostic features:** Corolla shortly obconical to tubular, reducing regularly towards the base, 8–26 mm long, dark red through to paler rose pink; **apex of the corolla lobes rounded; calyx with adaxial sessile glands**; anthers bilobed not distinctly bipartite; ovary emarginate, obovoid, covered with dense, short, retrorse hairs; leaves 8–14 mm long. Differs from species of the *abietina* clade in corolla colour (yellow, orange above in *E. quadrisulcata*) and form of corolla (lacking the four grooves at base of the tube in *E. quadrisulcata* and the basal restriction zone of eight grooves in *E. nevillei*); in inflorescence structure (lacking the spike-like arrangement at ends of branches in *E. nevillei*); and anther exertion (included in *E. abietina*; exerted in *E. nevillei*).

**Distribution:** Restricted to mountains on the Cape Peninsula. 50–900 m.

Subsp. ***abietina***

*Erica coccinea sensu* P.J.Bergius: 92 (1767), non L.: 355 (1753); Benth.: 627 (1839); Guthrie & Bolus: 59 (1905). Type: without locality or collector (SBT).

**Illustrations:** Schumann & Kirsten: 46. t. 26 (1992); Oliver & Oliver: t. 9 (2000).

**Diagnostic features:** Corolla dark red, tubular, 18–26 mm long, spiculed to sparsely puberulous and slightly viscid; sepals subovate, narrowly acute to acuminate, sparsely pilose with adaxial sessile glands; anthers included to exerted; leaves 10–12 mm long.

**Distribution:** Upper rocky slopes and plateau of Table Mountain; 500–900 m. [Figure 1A](#).

**Conservation status:** Classified as 'least concern'.

Subsp. ***atrorosea*** E.G.H.Oliv. & I.M.Oliv.: 50 (2002). Type: Western Cape. 3418 (Simonstown): Froggy Pond, (-AB), 14 June 1949, *Barker 5355* (NBG).

*Erica purpurea* Andrews: t. 50 (1795); Benth.: 627 (1839); Guthrie & Bolus: 58 (1905). Iconotype: Andrews: t. 50 (1795).

*Erica phyllicifolia* Salisb.: 364 (1802); Salter: 636 (1951); Dulfer: 36 (1965). Type: Sponte nascentem in Hottentots Holland. *I. Mulder s.n.* (K!).

*Erica hesseana* J.C.Wendl. ex Klotzsch: 634 (1835); Guthrie & Bolus: 61 (1905); Dulfer: 38 (1965). Type: Prom. b. sp.. *Hesse s.n.* (MEL!).

**Illustration:** Schumann & Kirsten: 45. t. 23 (1992).

**Diagnostic features:** Corolla rose to deep rose, tubular, 18–22 mm long, ± glabrous and somewhat sticky; sepals broadly lanceolate, shortly acuminate, sparsely puberulous with adaxial sessile glands; anthers included, occasionally manifest; leaves 8–14 mm long.

**Distribution:** Lower slopes of Table Mountain at Kirstenbosch along the mountains southwards to Cape Point; 50–400 m (not sympatric with subsp. *abietina*); the most widespread subspecies. [Figure 1B](#).

**Conservation status:** Classified as 'least concern'.

Subsp. ***diabolis*** E.G.H.Oliv. & I.M.Oliv.: 51 (2002). Type: Western Cape, 3318 (Cape Town): saddle between Devil's Peak and Table Mountain, 2100 ft [640 m], (-CD), 25 August 1973, *Kirsten 422* (NBG).

*Erica coccinea* L. var. *echiiflora sensu* Bolus: 60 ([Guthrie & Bolus, 1905](#)) non *E. echiiflora* Andrews. *E. abietina* var. *echiiflora* (Bolus) Salter: 643 (1951); Dulfer: 37 (1965). Illustration: Schumann & Kirsten: 46, t. 27 (1992).

**Diagnostic features:** Corolla rose-pink, shortly obconical, 11–14 mm long, subglabrous, subviscid; sepals ovate, shortly acuminate, pilose; anthers included, situated about 2/3 way up tube; leaves 10–12 mm long.

**Distribution:** Only on the saddle between Devil's Peak and Table Mountain; 600–900 m. [Figure 1C](#).

**Conservation status:** Classified as 'critically endangered', due largely to its limited extent.

Subsp. ***constantiana*** E.G.H.Oliv. & I.M.Oliv.: 51 (2002). Type: Western Cape, 3418 (Simonstown): Constantiaberg, middle N slopes, 620 m, (-AB), 21-09-1999, *E.G.H. & I.M. Oliver 11335* (NBG).

*Erica conica* Lodd.: t. 1179 (1824); Benth.: 664 (1839); Guthrie & Bolus: 60 (1905); Salter: 649 (1951); Dulfer: 37 (1965). Iconotype: Lodd.: t. 1179 (1824).

*Illustrations:* Schumann & Kirsten: 47, t. 28, 29 (1992); Oliver & Oliver: t. 10b (2000).

*Diagnostic features:* Corolla pale to deeper rose-pink; obconical, 8–11 mm long, glabrous, subviscid; sepals lanceolate-ovate, subacuminate; anthers always included, situated about  $\frac{2}{3}$  way up tube; leaves 8–14 mm long; very similar to subsp. *diabolis*.

*Distribution:* Mountains from Constantia Nek to Chapman's Peak; 350–600 m. [Figure 1D](#).

*Conservation status:* Classified as 'rare'.

*Erica grandiflora* L.f., Supplementum plantarum: 223 (1782); Benth.: 628 (1839); Guthrie & Bolus: 57 (1905). Type: Caput bonae spei. *Thunberg s.n.* (UPS).

*Diagnostic features:* **Corolla orange-red, orange or yellow**, tubular, 10–34 mm long, lobes acute; calyx long-acuminate from ovate base, **with adaxial sessile glands**, anthers bipartite often with highly reduced appendages along edge of apex of the filament, leaves 16–42 mm long. Morphologically variable, but differs from species of the *viscaria* clade in corolla colour (contrasting with purple, pink or white in *E. viscaria* subsp. *pendula*, *E. latiflora*, *E. nematophylla*, *E. filamentosa*); hairiness of the sepals (as opposed to non-hairy in *E. vestita*, *E. viscaria* subsp. *pustulata* and *macrosepala*); hairiness of the ovary (as opposed to non-hairy in *E. hibbertii* and *E. pinea*); exertion of the style (not exerted in *E. viscaria* subsp. *viscaria* and *gallorum*); and mode of regeneration (re-seeding as opposed to re-sprouting in the also highly morphologically variable *E. viscaria* subsp. *longifolia*).

*Distribution:* Widespread on the mainland in the CFR (see subsp. *grandiflora*), but not on the Cape Peninsula. *Erica grandiflora* was previously regarded as a synonym of *E. abietina* subsp. *aurantiaca*.

#### Subsp. *grandiflora*

*Erica abietina* subsp. *aurantiaca* E.G.H.Oliv. & I.M.Oliv.: 51 (2002). Type: Western Cape, 3319 (Worcester): Fransch Hoek Pass, mtn slopes NE of top of pass, 2500 ft (760 m), (-CC), February 1966, *Chater in STE30037* (NBG, holotype BM, BOL, K, PRE).

*Erica exurgens* Andrews: t. 22 (1796); Benth.: 627 (1839); Guthrie & Bolus: 57 (1905); Dulfer 35 (1965).

*E. grandiflora* var. *exurgens* E.G.H.Oliv.: 204 (1967). Iconotype: Andrews: t. 22 (1794–1802).

*Illustrations:* Baker & Oliver, t. 14 (1967); Schumann & Kirsten 44, t. 14 (1992).

*Diagnostic features:* Corolla orange to orange-red (10–)25–30[–34] mm long, glabrous, sometimes with a few hairs on lobes, sticky to non-sticky; sepals long acuminate from ovate base, with large area of adaxial sessile glands; anthers included to far exerted; leaves 16–20 mm long.

*Distribution:* On the mainland from the hills just north-east and east of Cape Town, inland to the Witteberg at Matjiesfontein, and south-east to the Langeberg near Ashton, but absent from the Cape Peninsula, open coastal hillslopes to rocky inland mountains, 80–1500 m. [Figure 1G](#).

*Conservation status:* Classified as 'least concern'.

Subsp. *perfoliosa* (E.G.H.Oliv. & I.M.Oliv.) E.G.H.Oliv. & Pirie comb. nov.

*Erica abietina* subsp. *perfoliosa* E.G.H.Oliv. & I.M.Oliv.: 52 (2002). Type: Western Cape, 3318 (Cape Town): Stellenbosch, Jonkershoek Twins, SW slopes, 600 m, (-DD), 24 May 2001, *E.G.H. & I.M.Oliver 11912* (NBG, holotype; BM, BOL, K, MO, NY, P, PRE, S).

*Illustration:* Schumann & Kirsten: 44, t. 15 (1992).

*Diagnostic features:* Corolla pure yellow, 20–25 mm long, densely, finely hairy, non-sticky; sepals broadly elliptic and long acuminate, with adaxial non-sticky sessile glands; anthers included to manifest; leaves 20–30(–42) mm long.

*Distribution:* Only in the Jonkershoek Valley near Stellenbosch on the moister granitic slopes facing south and south-west; 250–640 m. [Figure 1H](#).

*Conservation status:* Classified as 'vulnerable'.

*Erica situshiemalis* E.G.H.Oliv. & Pirie stat. & nom. nov.

*E. abietina* subsp. *petraea* E.G.H.Oliv. & I.M.Oliv.: 53 (2002), non *E. petraea* Benth.: 668 (1839). Type: Western Cape, 3319 (Worcester): Porterville area, Groot Winterhoek Mtns, Kliphuisvlakte, road to Groot Kliphuis, rock crevices in rocky outcrop, 1140 m, (-AA),



23 November 1999, *E.G.H. & I.M. Oliver 11440* (NBG, holotype; K, PRE). Etymology. Latin: *situs* = the place, site + *hiemalis* = of winter, wintery; from Winter + hoek = corner, place or region (Afrikaans).

**Diagnostic features:** Corolla pure yellow, ± 20 mm long, densely and finely hairy, non-sticky, lobes acute; sepals narrow lanceolate, acute, **without adaxial sessile glands**; anthers manifest to exerted. Differs from related species of the *abietina/viscaria* clade in corolla (tubular inflated to campanulate and 4–10 mm long in *E. parilis* Salisb.; urceolate, 3–5 mm long, pink, with large pink petaloid sepals in *E. collina* Guth. & Bol.).

**Distribution:** Rock ledges and crevices only, restricted to a few rocky outcrops on the mountains above Porterville; 1000–1100 m. **Figure 11.**

**Conservation status:** Classified as ‘endangered’. Known populations of *E. situshiemalis* are few and highly localized; some but not all fall within the protection of the Groot Winterhoek reserve. Those on the Porterville plateau outside the reserve are threatened by farming activities and invasion from alien vegetation combined with increased frequency of fire.

#### ACKNOWLEDGEMENTS

The authors are grateful for the assistance of Cape Nature and South Africa National Parks with collection permits. Funding was provided by the DFG (PI1169/1-1 to M.P.); the National Research Foundation (South Africa; to M.P. and D.B.); the Claude Leon Foundation (to M.P.); the Ministerium für Klimaschutz, Umwelt, Landwirtschaft, Natur- und Verbraucherschutz des Landes Nordrhein-Westfalen; the Faculty of Agriculture Lehr- und Forschungsschwerpunkt ‘Umweltverträgliche und Standortgerechte Landwirtschaft’, Bonn University; and the Landgard foundation (A.M.K.). Joachim Kadereit is acknowledged for consultations; Olga Betz and Silvia Wienken for assistance with laboratory work; Corinne Merry, Anthony Hitchcock, Margaret de Villiers, Muthama Muasya, Charlie Stirton and Benny Bytebier for providing samples; and two anonymous reviewers for providing constructive comments.

#### REFERENCES

**Andrews HC. 1794–1802.** *Coloured engravings of heaths*. London.

**Baker HA, Oliver EGH. 1967.** *Ericas in southern Africa*. Cape Town: Purnell.

**Baldwin BG, Markos S. 1998.** Phylogenetic utility of the external transcribed spacer (ETS) of 18S-26S rDNA: congruence of ETS and ITS trees of *Calycadenia* (Compositae). *Molecular Phylogenetics and Evolution* **10**: 449–463.

**Bellstedt DU, Pirie MD, Visser JC, de Villiers MJ, Gehrke B. 2010.** A rapid and inexpensive method for the direct PCR amplification of DNA from plants. *American Journal of Botany* **97**: e65–e68.

**Bentham G. 1839.** Ericaceae. In: De Candolle AP, ed. *Prodromus systematis naturalis regni vegetabilis*. Paris: Treutel & Weiss, 580–733.

**Bergius PJ. 1767.** *Descriptiones plantarum ex Capite bonae spei*. Stockholm: Salvius.

**Cowling RM, Pressey RL. 2001.** Rapid plant diversification: planning for an evolutionary future. *Proceedings of the National Academy of Sciences of the USA* **98**: 5452–5452.

**Douzery EJ, Pridgeon AM, Kores P, Linder HP, Kurzweil H, Chase MW. 1999.** Molecular phylogenetics of Deseae (Orchidaceae): a contribution from nuclear ribosomal ITS sequences. *American Journal of Botany* **86**: 887–899.

**Doyle JJ. 1992.** Gene trees and species trees: molecular systematics as one-character taxonomy. *Systematic Botany* **17**: 144–163.

**Doyle JJ. 1997.** Trees within trees: genes and species, molecules and morphology. *Systematic Biology* **46**: 537–553.

**Dulfer H. 1964.** Revision der Südafrikanischen Arten der Gattung *Erica* L. 1 Teil. *Annalen des Naturhistorischen Museums in Wien* **67**: 79–147.

**Dulfer H. 1965.** Revision der Südafrikanischen Arten der Gattung *Erica* L. 2 Teil. *Annalen des Naturhistorischen Museums in Wien* **68**: 25–177.

**Forest F, Grenyer R, Rouget M, Davies TJ, Cowling RM, Faith DP, Balmford A, Manning JC, Procheş S, van der Bank M, et al. 2007.** Preserving the evolutionary potential of floras in biodiversity hotspots. *Nature* **445**: 757–760.

**Frodin DG. 2004.** History and concepts of big plant genera. *Taxon* **53**: 753–776.

**Fujita MK, Leaché AD, Burbrink FT, McGuire JA, Moritz C. 2012.** Coalescent-based species delimitation in an integrative taxonomy. *Trends in Ecology & Evolution* **27**: 480–488.

**Global Carex Group. 2015.** Making *Carex* monophyletic (Cyperaceae, tribe Cariceae): a new broader circumscription. *Botanical Journal of the Linnean Society* **179**: 1–42.

**Guthrie F, Bolus H. 1905.** *Erica*. In: WT Thistleton-Dyer, ed. *Flora Capensis*. London: Reeve, 4–513.

**Helme NA, Trinder-Smith TH. 2006.** The endemic flora of the Cape Peninsula, South Africa. *South African Journal of Botany* **72**: 205–210.

**Huson DH, Scornavacca C. 2012.** Dendroscope 3: an interactive tool for rooted phylogenetic trees and networks. *Systematic Biology* **61**: 1061–1067.

**IUCN. 2016.** *The IUCN Red List of Threatened Species*. Version 2016-2.

**Klotzsch JF. 1835.** *Ericacearum*. *Linnaea* **9**: 634.

**Kraaij T, Van Wilgen BW. 2014.** Drivers, ecology, and management of fire in fynbos. In: Allsopp N, Colville JF, Verboom

- GA, eds. *Fynbos. Ecology, evolution, and conservation of a megadiverse region*. Oxford: Oxford University Press, 47–72.
- Lanfear R, Calcott B, Ho SY, Guindon S. 2012.** Partitionfinder: combined selection of partitioning schemes and substitution models for phylogenetic analyses. *Molecular Biology and Evolution* **29**: 1695–1701.
- Li J, Zhang D, Alexander JH. 2001.** Classification of tree lilacs (subgenus *Ligustrina*, *Syringa*, Oleaceae): morphology and DNA sequence tell a similar story. *Harvard Papers in Botany* **5**: 517–529.
- Linder HP. 2003.** The radiation of the Cape flora, southern Africa. *Biological Reviews* **78**: 597–638.
- Linnaeus Cv. 1753.** *Species plantarum*, vol. 1. Stockholm: Salvius.
- Linnaeus C, Dahlgren JA. 1770.** *Dissertationem botanicam de Erica*. Uppsala: Typis Edmannianis.
- Linnaeus C. 1782.** *Supplementum plantarum*. Braunschweig.
- Loddiges CL. 1824.** *Botanical cabinet; consisting of coloured delineations*.
- Maddison WP. 1997.** Gene trees in species trees. *Systematic Biology* **46**: 523–536.
- Maddison WP, Maddison DR. 2015.** *Mesquite: a modular system for evolutionary analysis*. Version 3.04. Available at: <http://mesquiteproject.org>, last accessed 24 April 2017.
- Moller M, Cronk Q. 1997.** Origin and relationships of *Saintpaulia* (Gesneriaceae) based on ribosomal DNA internal transcribed spacer (ITS) sequences. *American Journal of Botany* **84**: 956.
- Mugrabi de Kuppler AL, Fagúndez J, Bellstedt DU, Oliver EGH, Léon J, Pirie MD. 2015.** Testing reticulate versus coalescent origins of *Erica lusitanica* using a species phylogeny of the northern heathers (Ericaceae, Ericaceae). *Molecular Phylogenetics and Evolution* **88**: 121–131.
- Müller KF. 2005.** The efficiency of different search strategies in estimating parsimony jackknife, bootstrap, and Bremer support. *BMC Evolutionary Biology* **5**: 58.
- Naciri Y, Linder HP. 2015.** Species delimitation and relationships: the dance of the seven veils. *Taxon* **64**: 3–16.
- Oliver EGH. 1976.** Studies in the Ericoideae. I. The genera *Eremia* and *Eremiella*. *Bothalia* **12**: 29–48.
- Oliver EGH. 1989.** The Ericoideae and the southern African heathers. *Botanical Journal of the Linnean Society* **101**: 319–327.
- Oliver EGH. 2000.** *Systematics of Ericaceae (Ericaceae-Ericoideae): species with indehiscent and partially dehiscent fruits*. Contributions from the Bolus Herbarium 19.
- Oliver EGH. 2007.** *Erica*. In: Jarvis C, ed. *Order out of chaos: Linnaean plant names and their types*. London: The Linnean Society of London in association with the Natural History Museum, London.
- Oliver EGH, Forshaw N. 2012.** *Genus Erica an identification aid, Version 3.00*. Contributions from the Bolus Herbarium 22.
- Oliver EGH, Linder HP, Rourke JP. 1983.** Geographical distribution of present-day Cape taxa and their phyto-geographical significance. *Bothalia* **14**: 427–440.
- Oliver EGH, Oliver IM. 2002.** The genus *Erica* (Ericaceae) in southern Africa: taxonomic notes 1. *Bothalia* **32**: 37–61.
- Oliver EGH, Oliver IM. 2003.** Ericaceae. In: Germishuizen G, Meyer NL, eds. *Plants of southern Africa: an annotated checklist. Strelitzia 19*. Pretoria: South African National Biodiversity Institute, 424–451.
- Oliver I, Oliver EGH. 2000.** *Field guide to ericas of the Cape Peninsula*. Cape Town: Protea Atlas Project, National Botanical Institute.
- Pelser PB, Nordenstam B, Kadereit JW, Watson LE. 2007.** An ITS phylogeny of tribe Senecioneae (Asteraceae) and a new delimitation of *Senecio* L. *Taxon* **56**: 1077–1104.
- Pirie MD. 2015.** Phylogenies from concatenated data: is the end nigh? *Taxon* **64**: 421–423.
- Pirie MD, Oliver EG, Bellstedt DU. 2011.** A densely sampled ITS phylogeny of the Cape flagship genus *Erica* L. suggests numerous shifts in floral macro-morphology. *Molecular Phylogenetics and Evolution* **61**: 593–601.
- Pirie MD, Oliver EGH, Mugrabi de Kuppler A, Gehrke B, Le Maitre NC, Kandziara M, Bellstedt DU. 2016.** The biodiversity hotspot as evolutionary hot-bed: spectacular radiation of *Erica* in the Cape Floristic Region. *BMC Evolutionary Biology* **16**: 1–11.
- Raimondo D, Van Staden L, Foden W, Victor JE, Helme NA, Turner RC, Kamundi DA, Manyama PA. 2009.** *Red list of South African plants 2009*. Pretoria: South African National Biodiversity Institute.
- Rebello AG, Boucher C, Helme NA, Mucina L, Rutherford MC. 2006.** Fynbos biome. In: Mucina L, Rutherford MC, eds. *The vegetation of South Africa, Lesotho and Swaziland*. Pretoria: South Africa National Biodiversity Institute, 53–219.
- Rebello AG, Siegfried WR. 1985.** Colour and size of flowers in relation to pollination of *Erica* species. *Oecologia* **65**: 584–590.
- Rebello AG, Siegfried WR, Oliver EGH. 1985.** Pollination syndromes of *Erica* species in the south-western Cape. *South African Journal of Botany* **51**: 270–280.
- Ronquist F, Teslenko M, van der Mark P, Ayres DL, Darling A, Höhna S, Larget B, Liu L, Suchard MA, Huelsenbeck JP. 2012.** MrBayes 3.2: efficient Bayesian phylogenetic inference and model choice across a large model space. *Systematic Biology* **61**: 539–542.
- Salisbury RA. 1802.** Species of *Erica*. *Transactions of the Linnean Society* **6**: 316–388.
- Salter TM. 1950.** *Erica*. In: Adamson RS, Salter TM, eds. *Flora of the Cape Peninsula*. Cape Town: Juta; 626–662.
- Schumann D, Kirsten G. 1992.** *Ericas of South Africa*. Vlaeberg: Fernwood Press.
- Shaw J, Lickey EB, Beck JT, Farmer SB, Liu W, Miller J, Siripun KC, Winder CT, Schilling EE, Small RL. 2005.** The tortoise and the hare II: relative utility of 21 noncoding chloroplast DNA sequences for phylogenetic analysis. *American Journal of Botany* **92**: 142–166.
- Shaw J, Lickey EB, Schilling EE, Small RL. 2007.** Comparison of whole chloroplast genome sequences to choose noncoding regions for phylogenetic studies in angiosperms: the tortoise and the hare III. *American Journal of Botany* **94**: 275–288.

- Simmons MT, Cowling RM. 1996.** Why is the Cape Peninsula so rich in plant species? An analysis of the independent diversity components. *Biodiversity & Conservation* **5**: 551–573.
- Stamatakis A. 2006.** RAxML-VI-HPC: maximum likelihood-based phylogenetic analyses with thousands of taxa and mixed models. *Bioinformatics* **22**: 2688–2690.
- Stamatakis A, Hoover P, Rougemont J. 2008.** A rapid bootstrap algorithm for the RAxML Web servers. *Systematic Biology* **57**: 758–771.
- Sun Y, Skinner DZ, Liang GH, Hulbert SH. 1994.** Phylogenetic analysis of *Sorghum* and related taxa using internal transcribed spacers of nuclear ribosomal DNA. *Theoretical and Applied Genetics* **89**: 26–32.
- Swofford DL. 2003.** *PAUP\*: phylogenetic analysis using parsimony (\*and other methods), version 4*. Sunderland: Sinauer Associates.
- Taberlet P, Gielly L, Pautou G, Bouvet J. 1991.** Universal primers for amplification of three non-coding regions of chloroplast DNA. *Plant Molecular Biology* **17**: 1105–1109.
- Trinder-Smith H, Cowling RM, Linder HP. 1996.** Profiling a besieged flora: endemic and threatened plants of the Cape Peninsula, South Africa. *Biodiversity & Conservation* **5**: 575–589.
- Vaidya G, Lohman DJ, Meier R. 2011.** SequenceMatrix: concatenation software for the fast assembly of multi-gene datasets with character set and codon information. *Cladistics* **27**: 171–180.
- Van der Niet T, Pirie MD, Shuttleworth A, Johnson SD, Midgley JJ. 2014.** Do pollinator distributions underlie the evolution of pollination ecotypes in the Cape shrub *Erica plukenetii*? *Annals of Botany* **113**: 301–315.
- Van Wilgen BW, Forsyth GG, Prins P. 2012.** The management of fire-adapted ecosystems in an urban setting: the case of Table Mountain National Park, South Africa. *Ecology and Society* **17**: 8.
- Volk F, Forshaw N, Oliver EGH, Oliver I. 2005.** Genus *Erica* interactive identification key, version 2.0. *Contributions from the Bolus Herbarium* **22**.
- Williams BRM, Mitchell TC, Wood JRI, Harris DJ, Scotland RW, Carine MA. 2014.** Integrating DNA barcode data in a monographic study of *Convolvulus*. *Taxon* **63**: 1287–1306.
- Wojciechowski MF, Sanderson MJ, Hu J-M. 1999.** Evidence on the monophyly of *Astragalus* (Fabaceae) and its major subgroups based on nuclear ribosomal DNA ITS and chloroplast DNA *trnL* intron data. *Systematic Botany* **24**: 409–437.

## SUPPORTING INFORMATION

Additional Supporting Information may be found in the online version of this article at the publisher's web-site.

**Appendix S1.** Aligned ETS matrix including cloned sequences and showing primer sites and the sequences used in their design.

**Appendix S2.** Overview of marker sampling and alignment lengths summarized using SequenceMatrix.

**Appendix S3.** ETS network and ITS tree, both representing strict consensus trees from the shortest trees recovered under parsimony.
